# Supplementary material for: Effect of graphene quantum dot size on plant growth
Source: Royal Society of Chemistry journal article supplement (doi:10.1039/d0nr01913e), 2020-01-01
Supplement: d0nr01913e1.pdf [file d0nr01913e1.pdf]

**Electronic Supplementary Material (ESI) for Nanoscale.  
This journal is © The Royal Society of Chemistry 2019**

## Supporting Information

# **Size Dependent Effect of Graphene Quantum Dots for Plants Growth**

*Yao Xu,<sup>a</sup> Yihua Lu,<sup>a</sup> Jiagen Li,<sup>a</sup> Rulin Liu,<sup>a</sup> Xi Zhu\*<sup>a</sup>*

<sup>a</sup>Shenzhen Institute of Artificial Intelligence and Robotics for Society (AIRS)  
Chinese University of Hong Kong, Shenzhen(CUHK-Shenzhen)  
14-15F, Tower G2, Xinghe World, Rd Yabao, Longgang District  
Shenzhen 518172, China  
E-mail: zhuxi@cuhk.edu.cn.

**Electronic Supplementary Material (ESI) for Nanoscale.**  
**This journal is © The Royal Society of Chemistry 2019**

**Supporting Table 1.** The mass change of Zephyranthes Grandiflora treated with different sizes of GQDs

| days | $\Delta m$<br>g/m <sup>2</sup><br>None | $\Delta m$<br>g/m <sup>2</sup><br>5nm | $\Delta m$<br>g/m <sup>2</sup><br>10nm | $\Delta m$<br>g/m <sup>2</sup><br>20nm | $\Delta m$<br>g/m <sup>2</sup><br>30nm |
|------|----------------------------------------|---------------------------------------|----------------------------------------|----------------------------------------|----------------------------------------|
| 1    | 0                                      | 0                                     | 0                                      | 0                                      | 0                                      |
| 2    | 1.02                                   | 1.01                                  | 1.17                                   | 1.00                                   | 0.57                                   |
| 3    | 1.09                                   | 0.63                                  | 1.13                                   | 1.09                                   | 0.61                                   |
| 4    | 1.02                                   | 1.04                                  | 1.15                                   | 0.76                                   | 1.01                                   |
| 5    | 1.05                                   | 1.00                                  | 1.25                                   | 0.94                                   | 1.2                                    |
| 6    | 1.07                                   | 1.31                                  | 1.31                                   | 0.83                                   | 0.92                                   |
| 7    | 0.85                                   | 1.22                                  | 1.12                                   | 0.70                                   | 1.26                                   |
| 8    | 1.03                                   | 1.46                                  | 1.18                                   | 0.95                                   | 1.42                                   |
| 9    | 1.07                                   | 1.29                                  | 1.11                                   | 0.95                                   | 0.69                                   |
| 10   | 1.18                                   | 1.37                                  | 1.55                                   | 1.01                                   | 0.97                                   |
| 11   | 1.08                                   | 1.25                                  | 1.09                                   | 0.91                                   | 1.24                                   |
| 12   | 1.26                                   | 1.29                                  | 1.39                                   | 1.24                                   | 1.15                                   |
| 13   | 1.24                                   | 1.31                                  | 1.26                                   | 1.17                                   | 1.08                                   |
| 14   | 1.28                                   | 1.15                                  | 1.48                                   | 1.17                                   | 1.13                                   |
| 15   | 1.21                                   | 1.32                                  | 1.26                                   | 1.15                                   | 1.12                                   |
| 16   | 1.31                                   | 1.27                                  | 1.64                                   | 1.22                                   | 1.15                                   |
| 17   | 1.32                                   | 1.49                                  | 1.57                                   | 1.08                                   | 1.08                                   |
| 18   | 1.35                                   | 1.38                                  | 1.65                                   | 1.10                                   | 1.11                                   |
| 19   | 1.43                                   | 1.35                                  | 1.59                                   | 1.40                                   | 1.17                                   |
| 20   | 1.32                                   | 1.47                                  | 1.68                                   | 1.03                                   | 1.23                                   |
| 21   | 1.43                                   | 1.33                                  | 1.72                                   | 1.15                                   | 1.16                                   |
| 22   | 1.37                                   | 1.35                                  | 1.81                                   | 1.20                                   | 1.06                                   |
| 23   | 1.41                                   | 1.42                                  | 1.43                                   | 1.26                                   | 1.15                                   |
| 24   | 1.35                                   | 1.36                                  | 1.63                                   | 1.28                                   | 1.13                                   |
| 25   | 1.49                                   | 1.45                                  | 1.68                                   | 1.41                                   | 1.31                                   |
| 26   | 1.42                                   | 1.41                                  | 1.51                                   | 1.32                                   | 1.28                                   |
| 27   | 1.41                                   | 1.40                                  | 1.77                                   | 1.22                                   | 1.35                                   |
| 28   | 1.40                                   | 1.51                                  | 1.55                                   | 1.36                                   | 1.24                                   |
| 29   | 1.42                                   | 1.44                                  | 1.53                                   | 1.32                                   | 1.29                                   |
